# Supplementary material
Source: publisher figshare collection journal article supplement (https://frontiersin.figshare.com/ndownloader/files/24338231)
Supplement: Supplementary file [file 24338231]

A) amplification of *Rv2228c* (1095 bp)

1. - 4.: clones *M. smegmatis*  $\Delta msmeg4305::attB+Rv2228c$   
 5.: pMV306Km+*Rv2228c*  
 6.: *M. smegmatis*  $mc^2$

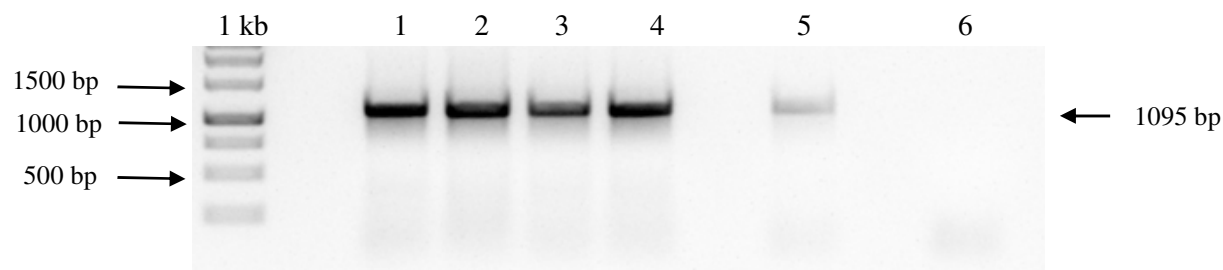

B) amplification of *msmeg4305* (wild type 1098 bp, deletion strain 379 bp)

1. - 2.: clones *M. smegmatis*  $\Delta rnhA/\Delta msmeg4305::attB+Rv2228c$   
 3.: *M. smegmatis*  $mc^2$   
 4.: *M. smegmatis*  $\Delta msmeg4305$

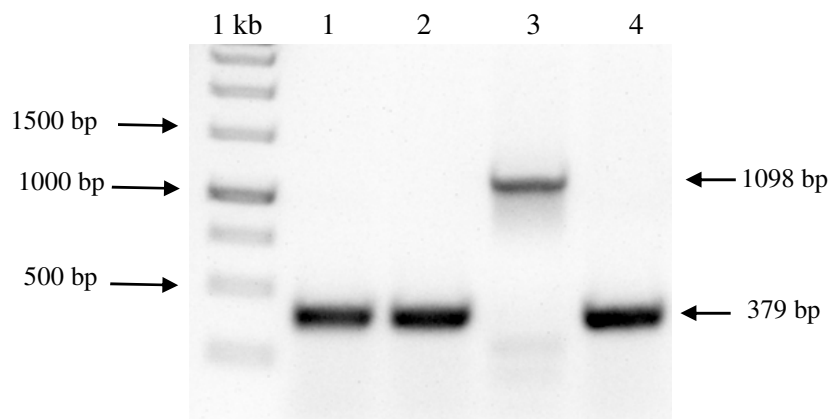

C) amplification of *Rv2228c* (1095 bp)

1. - 2.: *M. smegmatis*  $\Delta rnhA/\Delta msmeg4305::+Rv2228c$   
 3.: *M. smegmatis*  $mc^2$   
 4.: *M. smegmatis*  $\Delta rnhA/\Delta msmeg4305::+4305$

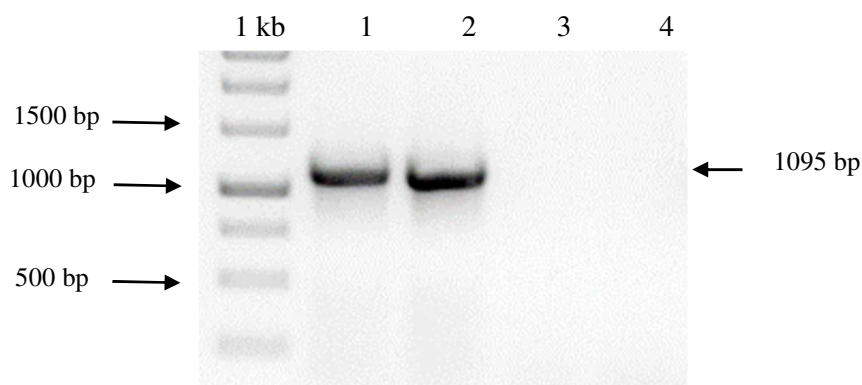

Fig. S3. PCR amplification of gene products confirming introduction of *Rv2228c* complementation plasmid into *M. smegmatis*. Fig. B) and Fig. C). depict the same clones 1 and 2 of

*ΔrnhA/Δmsmeg4305::+Rv2228c*. Amplification of MSMEG\_4305 allowed to control potential reintroduction of the wild type MSMEG\_4305 back to the native site at the time of complementation with Rv2228c. PCR products of *ΔrnhA/Δmsmeg4305::+Rv2228c* amplified with primers targeting MSMEG\_4305 show that the native site contains mutant version of MSMEG\_4305.
